# Supplementary material
Source: MDPI journal article supplement (https://www.mdpi.com/1424-8247/17/4/446)
Supplement: s1 [file s1]

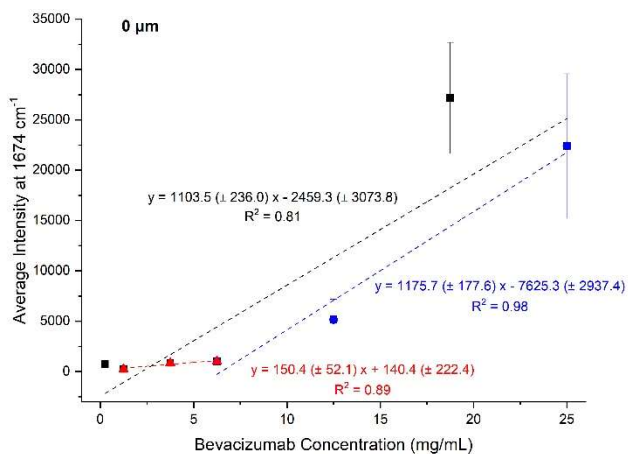

(a)

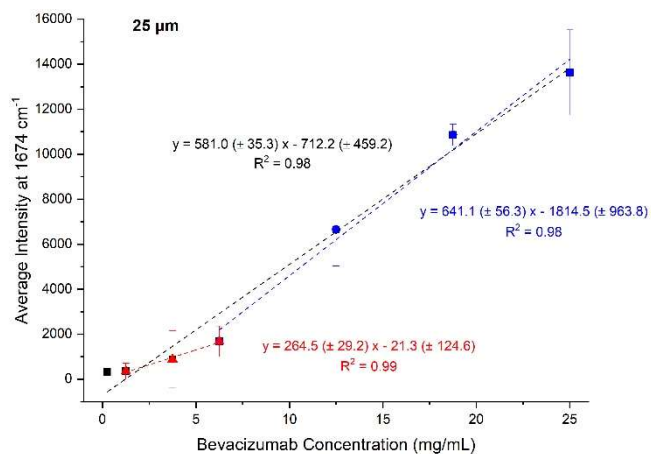

(b)

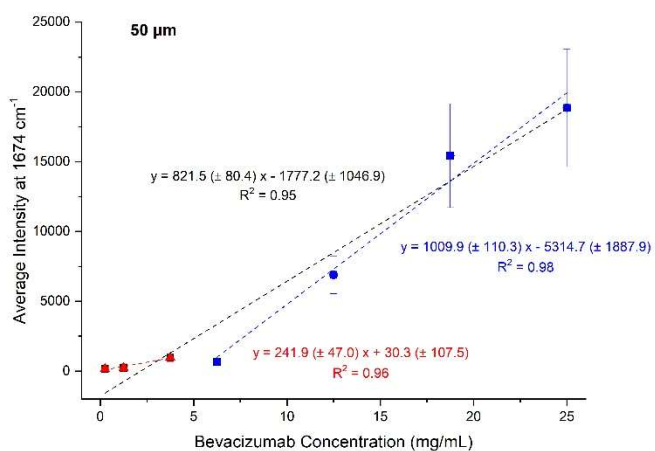

(c)

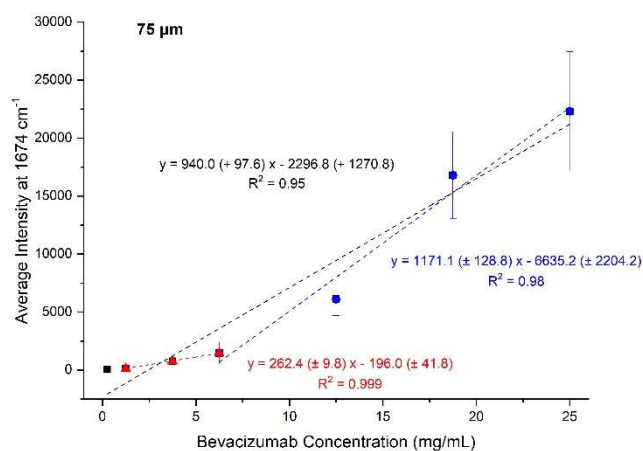

(d)

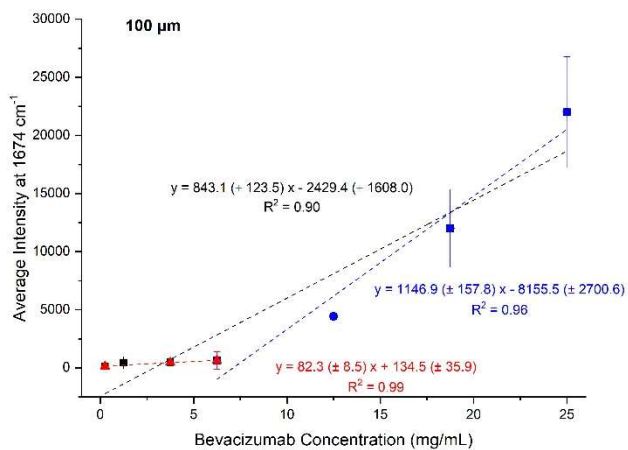

(e)

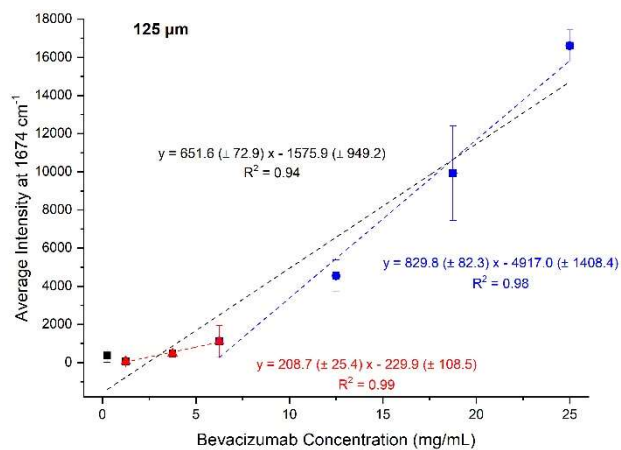

(f)

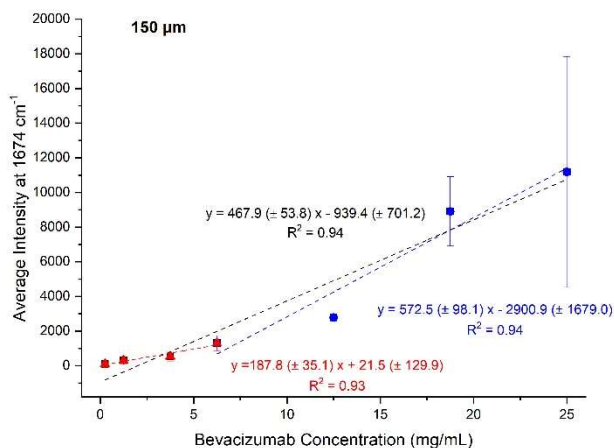

(g)

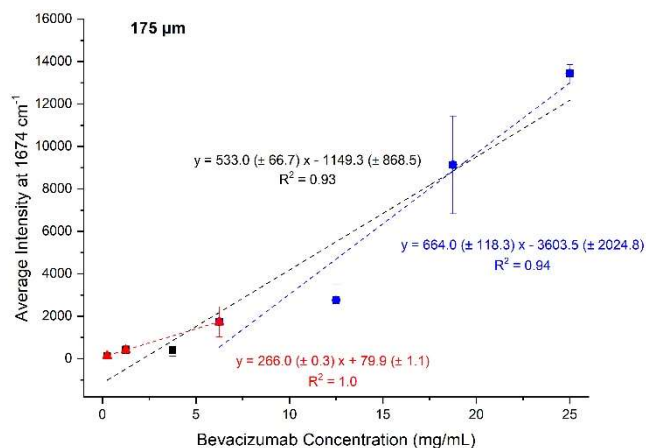

(h)

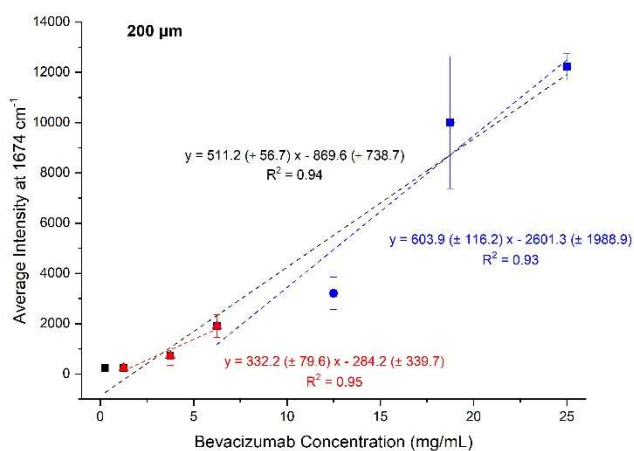

(i)

**Figure S1.** Calibration curves at the whole calibration standards concentration range (0.25 mg/mL – 25.00 mg/mL, black dashed lines), at the high (6.25 mg/mL – 25.00 mg/mL, blue dashed lines) and at the low concentration working range (0.25 mg/mL – 6.25 mg/mL, red dashed lines) of the average intensity of bevacizumab peaks at 1674 cm<sup>-1</sup> plotted against bevacizumab concentration at distances of (a) 0 μm; (b) 25 μm; (c) 50 μm; (d) 75 μm; (e) 100 μm; (f) 125 μm; (g) 150 μm; (h) 175 μm; (i) 200 μm from the edge of each dried droplet.

**Table S1.** Calibration curves, coefficient of determination ( $R^2$ ) values, DLs and QLs for the three different circular circumferences (summarized results of the rotation method)

| Circular Circumference of Rotation | Calibration Curve                                | $R^2$ | DL (mg/mL) | QL (mg/mL) |
|------------------------------------|--------------------------------------------------|-------|------------|------------|
| Edge                               | $y = 2188.9 (\pm 250.7) x - 1763.1 (\pm 3860.2)$ | 0.96  | 5.82       | 17.64      |
| Middle                             | $y = 1720.8 (\pm 84.0) x + 1792.5 (\pm 1293.7)$  | 0.993 | 2.48       | 7.52       |
| Center                             | $y = 1470.2 (\pm 30.8) x + 731.4 (\pm 474.1)$    | 0.999 | 1.06       | 3.22       |

**Table S2.** Calibration curves, coefficient of determination ( $R^2$ ) values, DLs and QLs for the different distances on the coffee ring (summarized results of the quarters method)

| Distance ( $\mu\text{m}$ ) | Working Range (mg/mL) | Calibration Curve                                | $R^2$ | DL (mg/mL) | QL (mg/mL) |
|----------------------------|-----------------------|--------------------------------------------------|-------|------------|------------|
| 0                          | 0.25 – 6.25           | $y = 150.4 (\pm 52.1) x + 140.4 (\pm 222.4)$     | 0.89  | 4.88       | 14.79      |
|                            | 6.25 – 25.00          | $y = 1175.7 (\pm 177.6) x - 7625.3 (\pm 2937.4)$ | 0.98  |            |            |
| 25                         | 0.25 – 6.25           | $y = 264.5 (\pm 29.2) x - 21.3 (\pm 124.6)$      | 0.99  | 1.55       | 4.71       |
|                            | 6.25 – 25.00          | $y = 641.1 (\pm 56.3) x - 1814.5 (\pm 963.8)$    | 0.98  |            |            |
| 50                         | 0.25 – 6.25           | $y = 241.9 (\pm 47.0) x + 30.3 (\pm 107.5)$      | 0.96  | 1.47       | 4.45       |
|                            | 6.25 – 25.00          | $y = 1009.9 (\pm 110.3) x - 5314.7 (\pm 1887.9)$ | 0.98  |            |            |
| 75                         | 0.25 – 6.25           | $y = 262.4 (\pm 9.8) x - 196.0 (\pm 41.8)$       | 0.999 | 0.53       | 1.59       |
|                            | 6.25 – 25.00          | $y = 1171.1 (\pm 128.8) x - 6635.2 (\pm 2204.2)$ | 0.98  |            |            |
| 100                        | 0.25 – 6.25           | $y = 82.3 (\pm 8.5) x + 134.5 (\pm 35.9)$        | 0.99  | 1.44       | 4.36       |
|                            | 6.25 – 25.00          | $y = 1146.9 (\pm 157.8) x - 8155.5 (\pm 2700.6)$ | 0.96  |            |            |
| 125                        | 0.25 – 6.25           | $y = 208.7 (\pm 25.4) x - 229.9 (\pm 108.5)$     | 0.99  | 1.71       | 5.20       |
|                            | 6.25 – 25.00          | $y = 829.8 (\pm 82.3) x - 4917.0 (\pm 1408.4)$   | 0.98  |            |            |
| 150                        | 0.25 – 6.25           | $y = 187.8 (\pm 35.1) x + 21.5 (\pm 129.9)$      | 0.93  | 2.28       | 6.92       |
|                            | 6.25 – 25.00          | $y = 572.5 (\pm 98.1) x - 2900.9 (\pm 1679.0)$   | 0.94  |            |            |
| 175                        | 0.25 – 6.25           | $y = 266.0 (\pm 0.3) x + 79.9 (\pm 1.1)$         | 1.0   | 0.01       | 0.04       |
|                            | 6.25 – 25.00          | $y = 664.0 (\pm 118.3) x - 3603.5 (\pm 2024.8)$  | 0.94  |            |            |
| 200                        | 0.25 – 6.25           | $y = 332.2 (\pm 79.6) x - 284.2 (\pm 339.7)$     | 0.95  | 3.37       | 10.23      |
|                            | 6.25 – 25.00          | $y = 603.9 (\pm 116.2) x - 2601.3 (\pm 1988.9)$  | 0.93  |            |            |
